# Supplementary material
Source: publisher site journal article supplement (https://www.spandidos-publications.com/3742/downloadSupplementary)

Figure S1. Representative images captured using a fluorescence microscope to confirm plasmid transfection. Scale bar, 100  $\mu$ m.

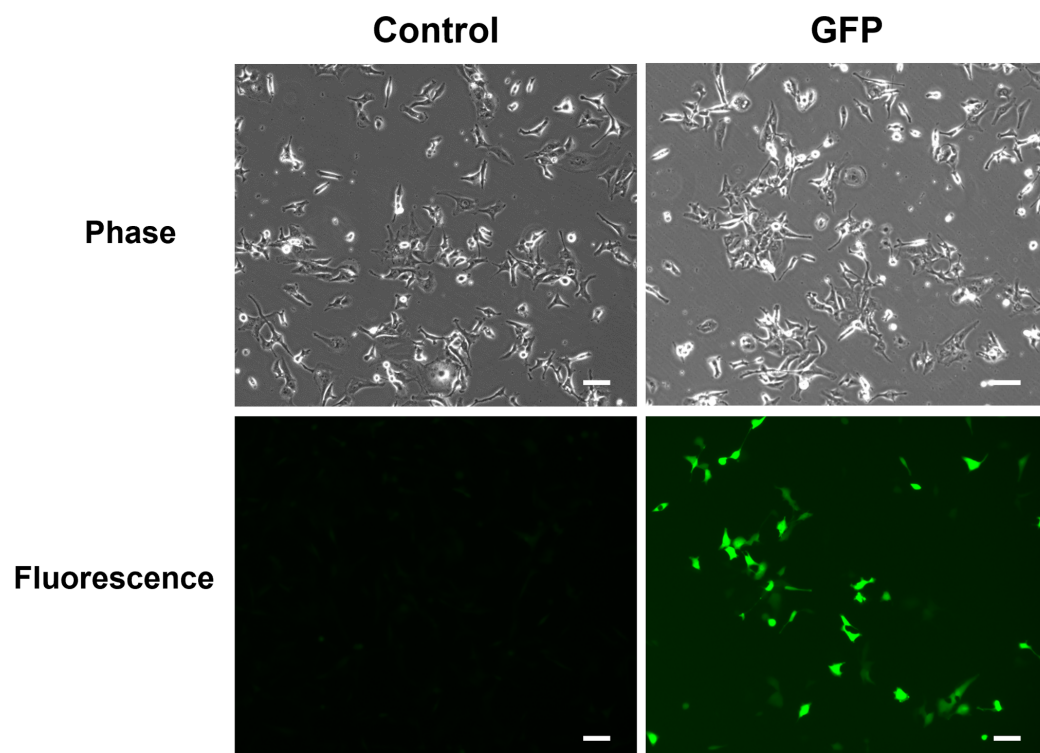

Supplement: Supplementary file 1 [file downloadSupplementary]
